# Supplementary material for: BTK regulates microglial function and neuroinflammation in human stem cell models and mouse models of multiple sclerosis
Source: PubMed Central journal article supplement — Nat Commun. 2024 Nov 22;15:10116. doi: 10.1038/s41467-024-54430-8 (PMC11584639; doi:10.1038/s41467-024-54430-8), 2024-11-22
Supplement: 41467_2024_54430_MOESM1_ESM.pdf [file 41467_2024_54430_MOESM1_ESM.pdf]

**A**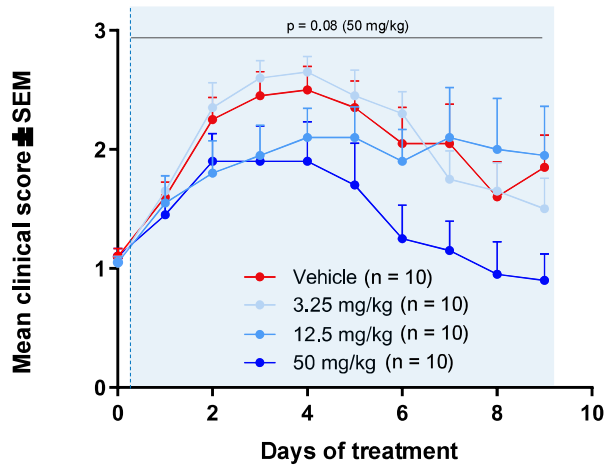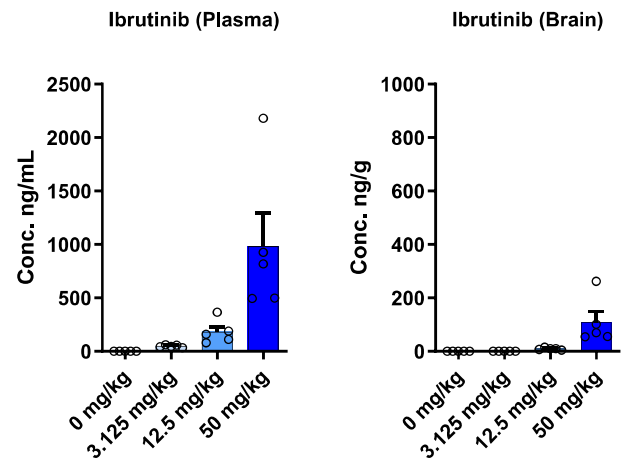**B**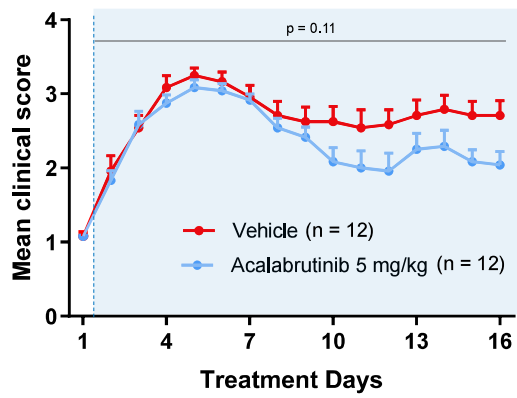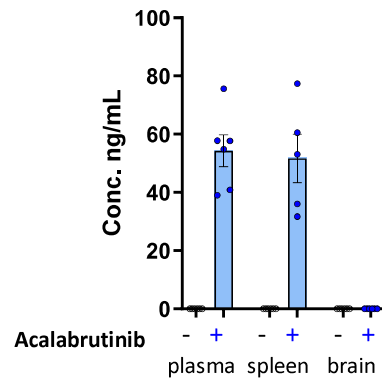

**Fig. S1. Non-CNS-penetrant BTK inhibition in the C57BL/6 EAE mouse model of MS.** (A) Disease scores over time in mice treated with BTK inhibitor ibrutinib and respective end-of-study inhibitor concentrations in plasma and brain, one hour post final dose. (B) Disease scores over time in mice treated with BTK inhibitor acalabrutinib and respective end-of-study inhibitor concentrations in plasma and brain, one hour post final dose. Therapeutic treatment started once disease scores initially reach 1.0-1.5 (i.e. treatment from onset). P-values are indicated by  $\leq 0.05$ ,  $\leq 0.01$ ,  $\leq 0.001$ , and  $\leq 0.0001$ . Source data are provided as a Source Data file.

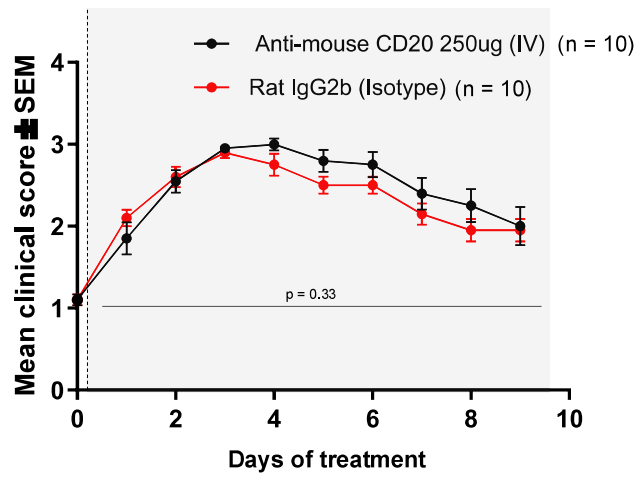

**Fig. S2. B cell depletion in the C57BL/6 EAE mouse model of MS.** Disease scores over time in mice treated with B cell-depleting anti-CD20 antibodies. Therapeutic treatment started once disease scores reached 1.0-1.5. Source data are provided as a Source Data file.

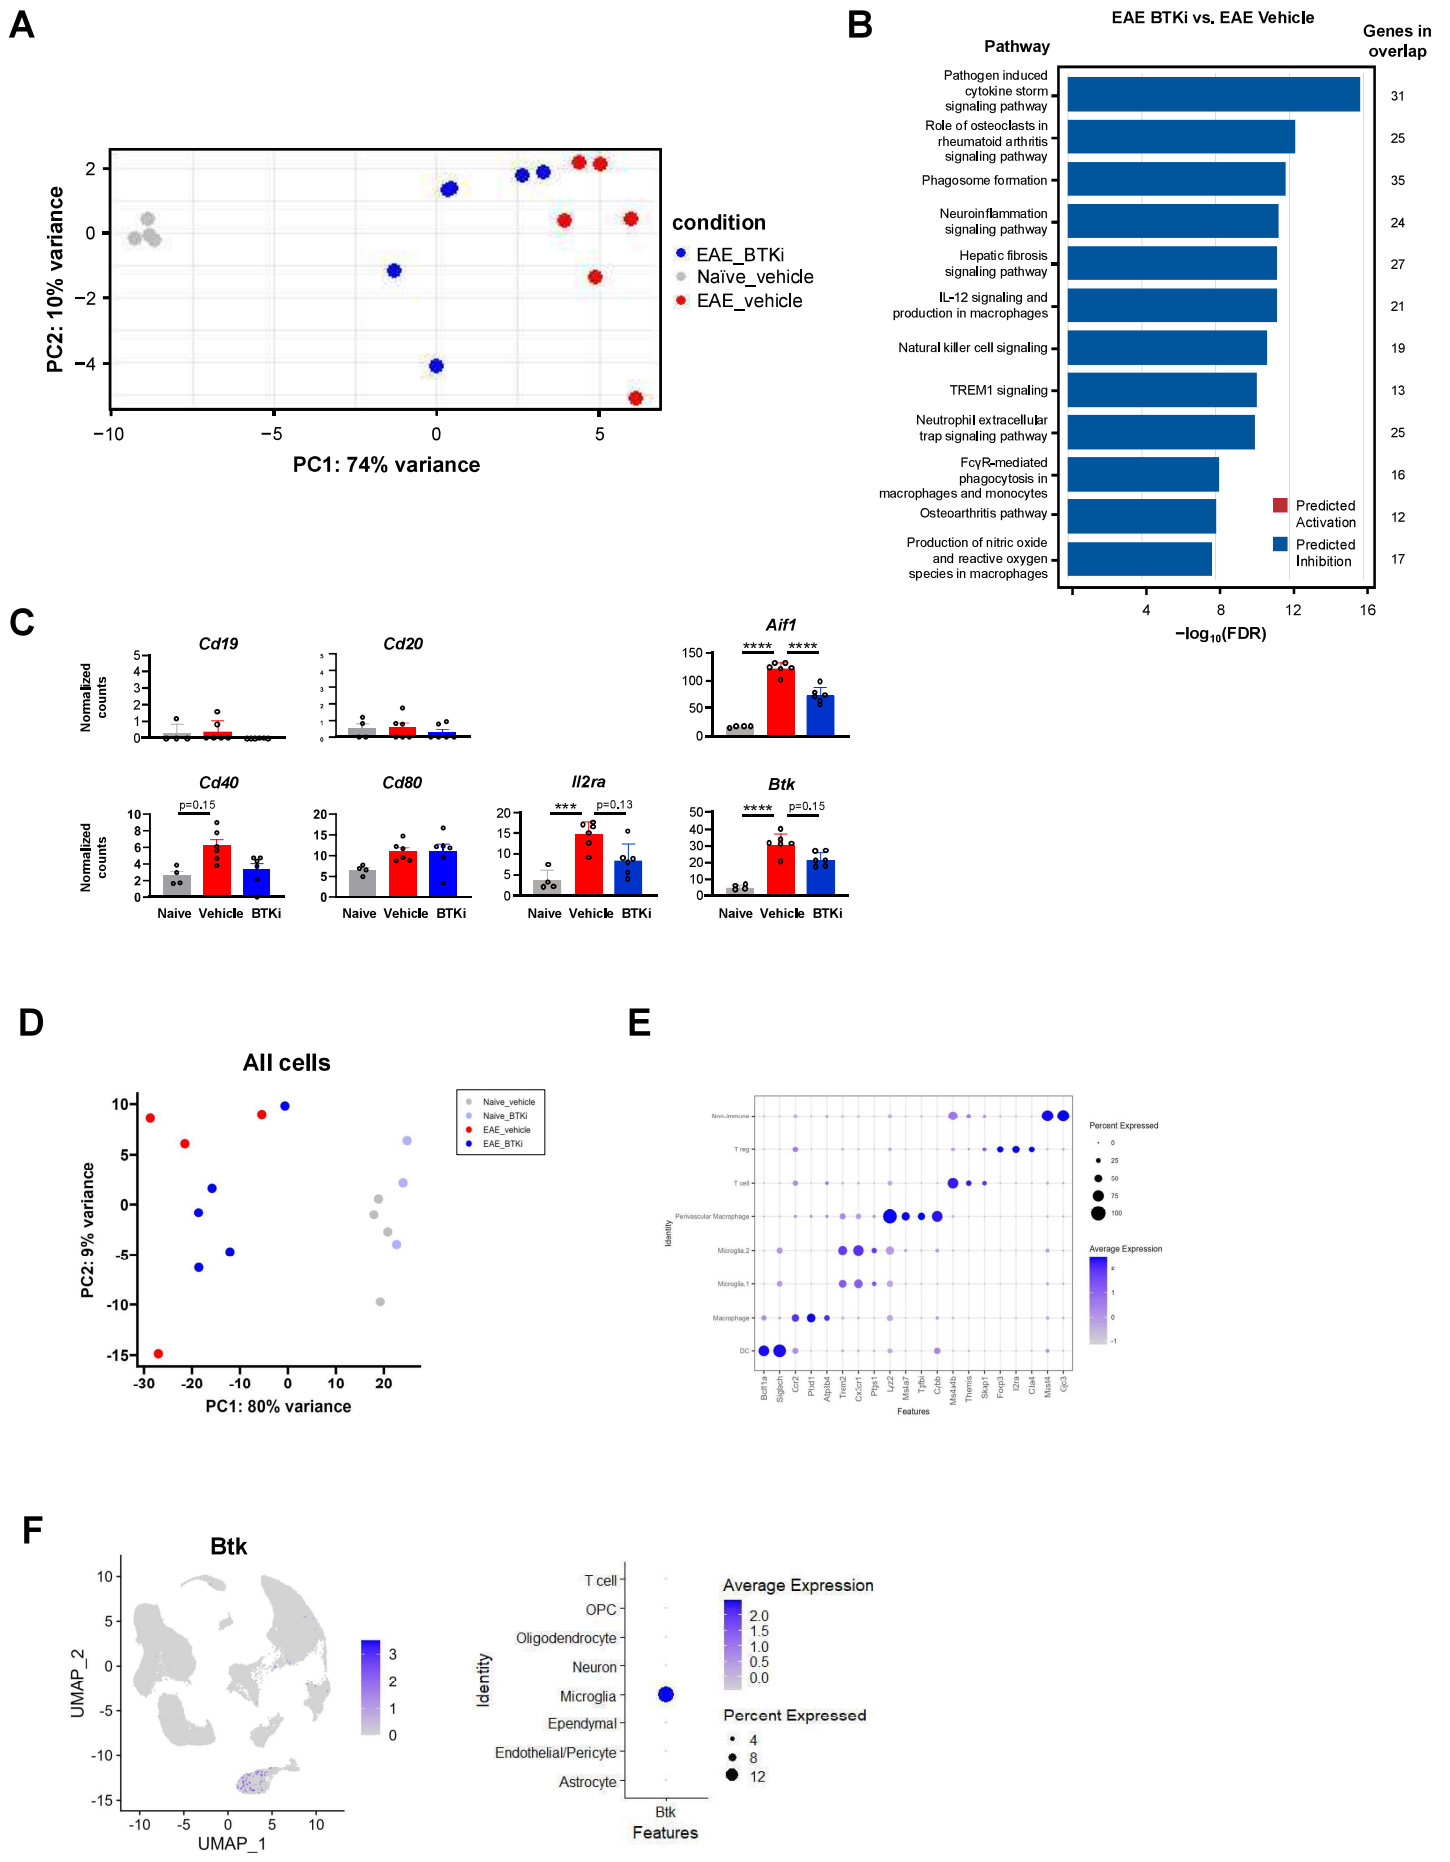

**Fig. S3. EAE-dependent transcriptional response after treatment initiation in the spinal cord of C57BL/6 EAE mice.** (A) Principal component analysis (PCA) of bulk RNA sequencing data from EAE mouse spinal cords, shown in Fig. 1C. Variance stabilizing transformed counts from DESeq2 were used for PCA. Profiles of individual animals are shown plotted against the two principal components comprising the greatest variance. (B) IPA pathway analysis of differentially expressed genes identified by bulk RNA sequencing in Fig. 1C. The 12 pathways that demonstrated the largest change ( $-\log_{10}(\text{FDR})$ ) and showed direction (i.e. had a z-score available) are presented. All 12 pathways shown were downregulated with EAE + PRN2675 vs EAE + vehicle. (C) DESeq2 normalized counts of the *Btk* gene and genes encoding markers of T lymphocytes (*Il2ra*), B lymphocytes (*Cd19*, *Cd20*, *Cd40*, and *Cd80*), and microglia/macrophages (*Aif1*), among bulk RNA sequencing dataset described in Fig. 1C. (D) PCA of snRNAseq all cell pseudo-bulk data from EAE mouse spinal cords, shown in Fig. 1D. Variance stabilizing transformed counts from DESeq2 were used. Profiles of individual animals are shown plotted against the two principal components comprising the greatest variance. (E) Dot plot of cell-type markers for immune cell types identified in Fig. 1E. (F) Cellular enrichment of *Btk* expression among the CNS cell-type clusters generated from snRNAseq of EAE mouse spinal cords, shown in Fig. 1D. P-values are indicated by  $*\leq 0.05$ ,  $**\leq 0.01$ ,  $***\leq 0.001$ , and  $****\leq 0.0001$ . BTK = Bruton's tyrosine kinase; BTKi = BTK inhibitor; EAE = experimental autoimmune encephalomyelitis; IL = interleukin; IPA = ingenuity pathway analysis.

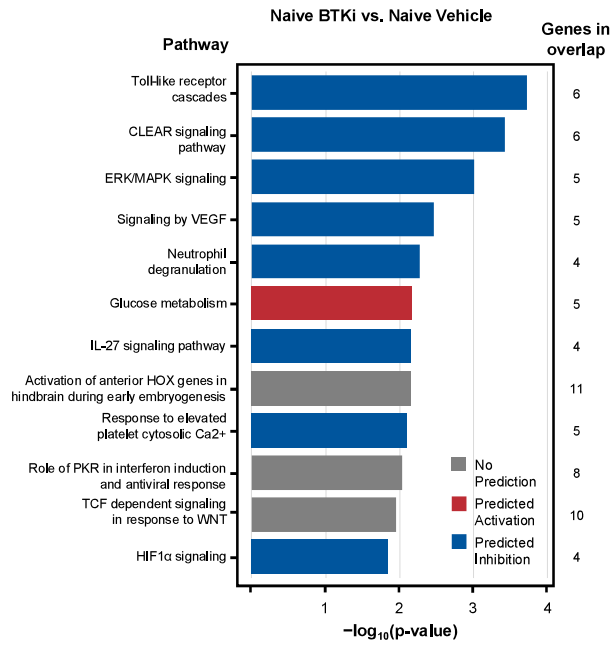

**Fig. S4. Transcriptional response after treatment initiation in the spinal cord of naive C57BL/6 mice.** Pathway analysis using IPA: Naive + PRN2675 vs naive + vehicle. The 12 pathways that demonstrated the largest change ( $-\log_{10}(\text{raw p-value})$ ) and showed direction (i.e. had a z-score available) are presented. The pathway analysis gene list is the PRN2675-dependent transcriptional signature identified in the left plot of Fig. 1G.



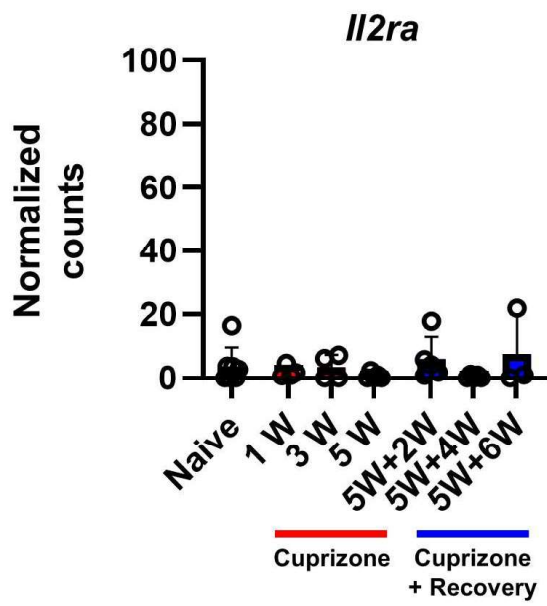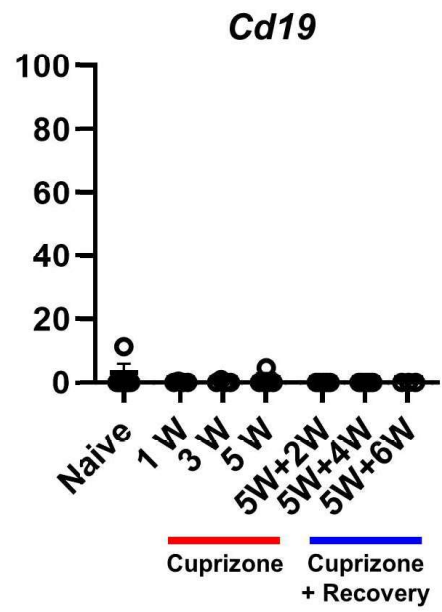

**Fig. S5. mRNA expression of genes encoding markers of T lymphocytes (*Il2ra*) and B lymphocytes (*Cd19*) in the cuprizone mouse model of demyelination. W = week.**

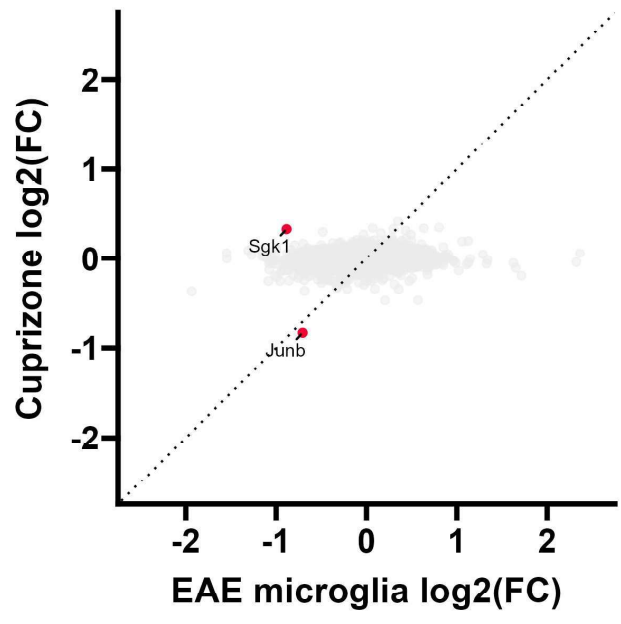

**Fig. S6. Genes commonly modulated by BTKi in cuprizone mouse model bulk spinal cord and EAE mouse microglia.** Four-way plot of cuprizone bulk spinal cord differential expression results for cuprizone + PRN2675 vs. cuprizone + vehicle (Fig. 2E) and EAE pseudo-bulk microglia differential expression results for EAE + PRN2675 vs EAE + vehicle (Fig. 1G, right). Labelled genes were commonly significantly differentially expressed genes between the two analyses (for EAE microglia, absolute(fold-change)  $\geq 1.5$  and raw p-value  $\leq 0.05$ ; for cuprizone bulk, absolute(fold-change)  $\geq 1.2$  and raw p-value  $\leq 0.05$ ).

**A**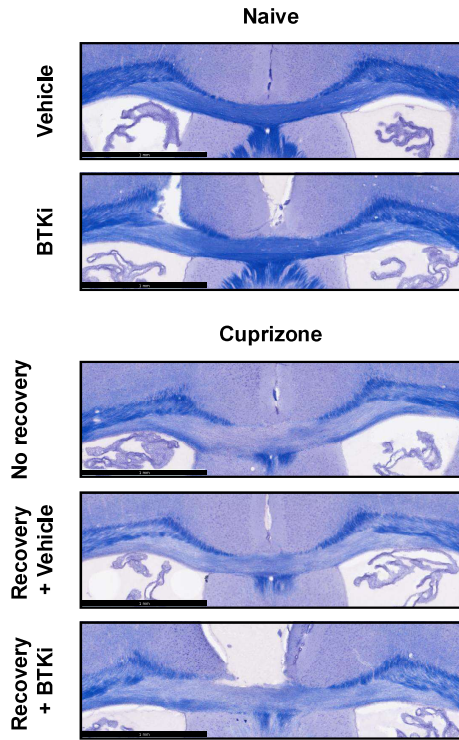**B**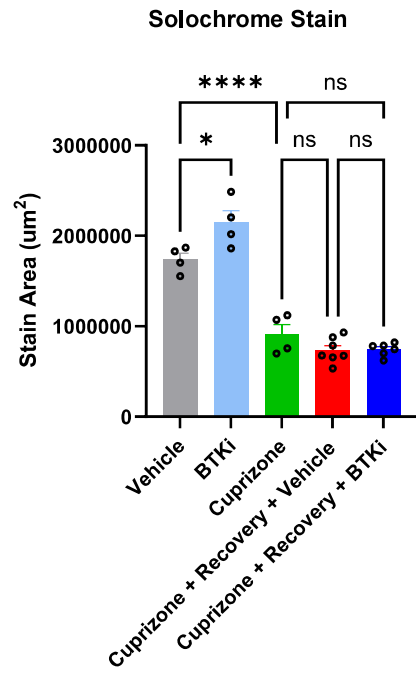

**Fig. S7. Effect of BTK-inhibiting tool compound PRN2675 on remyelination in a cuprizone mouse model of demyelination.** PRN2675 was administered after 5 weeks of cuprizone treatment and continued for 4 days alongside cuprizone recovery. The cuprizone alone condition denotes 5 weeks of cuprizone with no subsequent recovery period. (A) Solochrome staining for intact myelin in the corpus callosum. (B) Solochrome stain area was measured using HALO. P-values are indicated by  $*\leq 0.05$ ,  $**\leq 0.01$ ,  $***\leq 0.001$ , and  $****\leq 0.0001$ . BTKi = Bruton's tyrosine kinase inhibitor. Source data are provided as a Source Data file.

**A**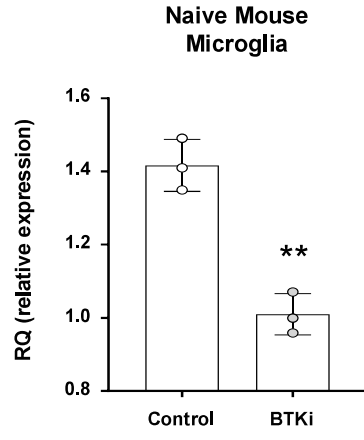**B**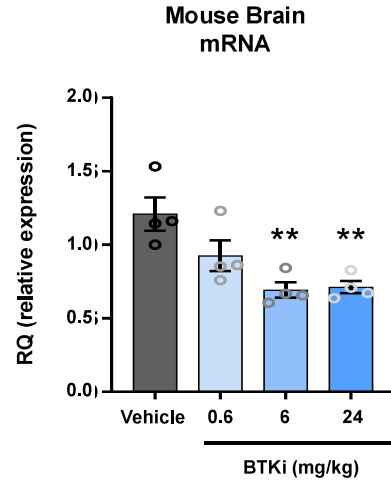

**Fig. S8. mRNA expression of the *Rgs1* gene.** (A) Mouse microglia treated with PRN2675. (B) Brain tissue from naïve mice administered a PRN2675 (dosed 1× daily orally for 5 days), compared with vehicle, indicate central pharmacodynamic effect of PRN2675 *in vivo*. RNA isolation from the one-quarter mouse brain was performed with a RNeasy Lipid Tissue Mini Kit (Qiagen, cat# 74804). Brain tissue was homogenized in 1 mL of QIAzol Lysis Reagent with a handheld homogenizer and the RNeasy kit was used per protocol. The RNA quantity was then measured using Nanodrop. cDNA was prepared with the Quantitect Reverse Transcription Kit (Qiagen, cat# 205313); cDNA was stored at  $-80^{\circ}\text{C}$  until use. For quantitative PCR, a master mix solution was prepared with the following volumes: 10  $\mu\text{L}$  Fastlane master mix, 5.3  $\mu\text{L}$   $\text{H}_2\text{O}$ , 0.5  $\mu\text{L}$  probe (Thermo Scientific, RGS1 Mm00450170\_m1), 0.2  $\mu\text{L}$  housekeeping probe 1 (Thermo Scientific, RPL37a: Mm01546394\_s1). The master mix was aliquoted into a 384-well PCR plate and 2  $\mu\text{L}$  sample was added to each well. Samples were run in triplicate. P-values are indicated by  $^*\leq 0.05$ ,  $^{**}\leq 0.01$ ,  $^{***}\leq 0.001$ , and  $^{****}\leq 0.0001$ . BTKi = Bruton's tyrosine kinase inhibitor; cDNA = complementary DNA; RQ = relative quantification. Source data are provided as a Source Data file.



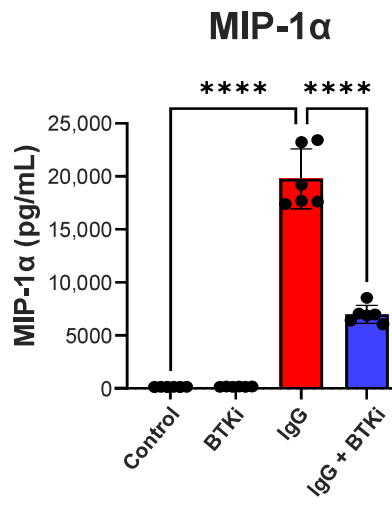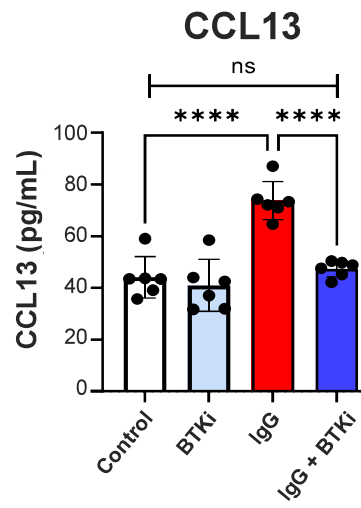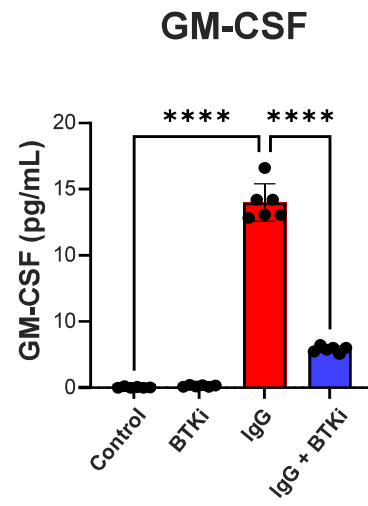

**Fig. S9. Effect of tolebrutinib 100 nM on secretion of MIP-1 $\alpha$ , CCL13, and GM-CSF in human iPSC-derived microglia, 24 hours after complexed IgG stimulation.** Complexed IgG used was 10  $\mu$ g/mL Fc OxyBURST™ (Invitrogen, F2902). \*\*\*\*  $P \leq 0.0001$ . P-values were calculated using one-way ANOVA with post hoc Sidak test. CCL = chemokine (C-C motif) ligand; GM-CSF = granulocyte-macrophage colony-stimulating factor; iPSC = induced pluripotent stem cell; IgG = immunoglobulin G; MIP = macrophage inflammatory protein; ns = non-significant. Source data are provided as a Source Data file.

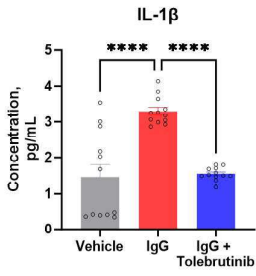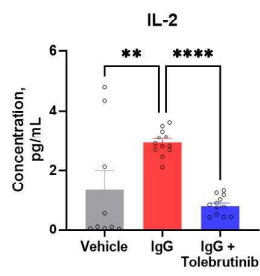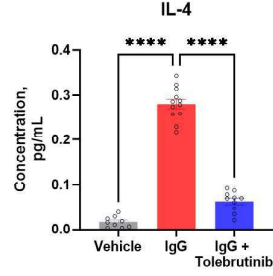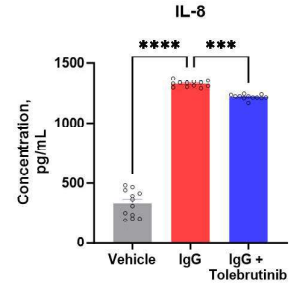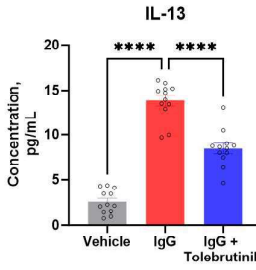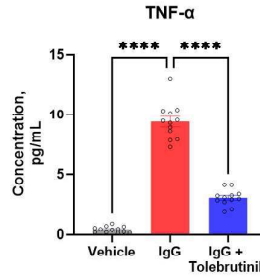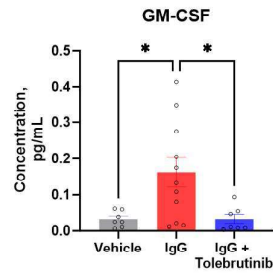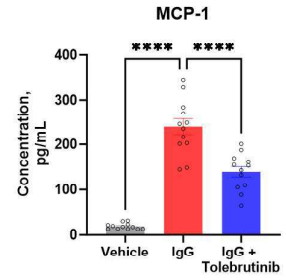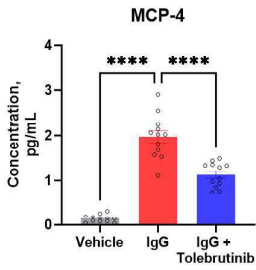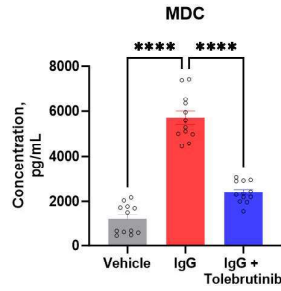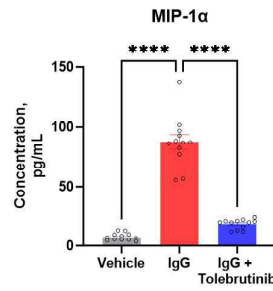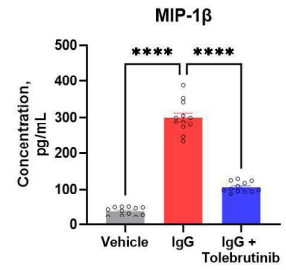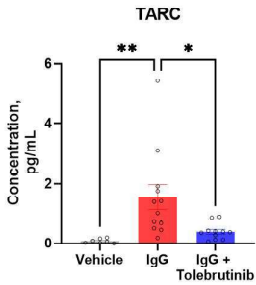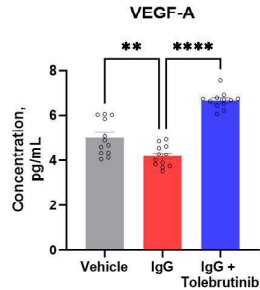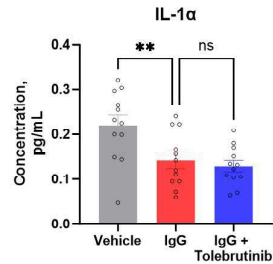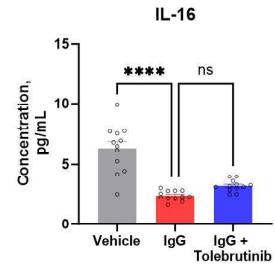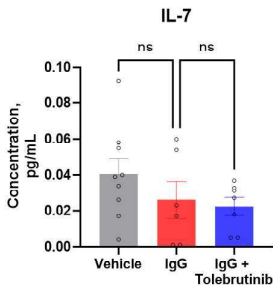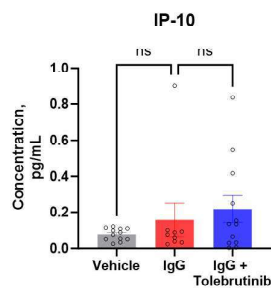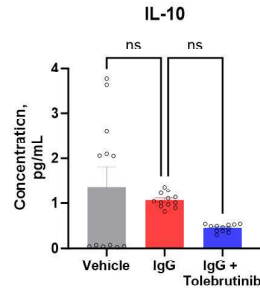

**Fig. S10. Effect of tolebrutinib 100 nM on cytokine and chemokine secretion in human microglia, when applied after IgG stimulation.** Assessments were made using multiplex panels, 24 hours after tolebrutinib and Fc OxyBURST™ (10 µg/mL) administration, which was added 24 hours after Fc OxyBURST™ alone. P-values are indicated by \* $\leq 0.05$ , \*\* $\leq 0.01$ , \*\*\* $\leq 0.001$ , and \*\*\*\* $\leq 0.0001$ . IL = interleukin; TNF = tumor necrosis factor; GM-CSF = granulocyte-macrophage colony-stimulating factor; MCP = monocyte chemoattractant protein; MDC = macrophage-derived chemokine; MIP = macrophage inflammatory protein; TARC = thymus and activated-regulated chemokine; VEGF = vascular endothelial growth factor; IP-10 = interferon gamma-induced protein 10. Source data are provided as a Source Data file.

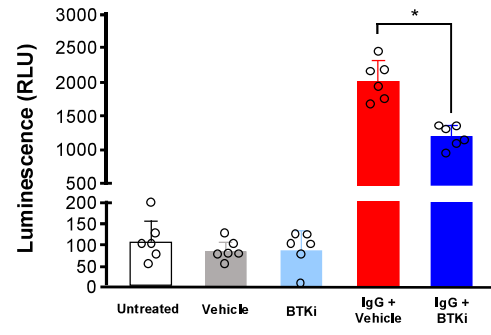

**Fig. S11. NF- $\kappa$ B activation in a human monocytic cell line.** Effect of tolebrutinib on NF- $\kappa$ B activation in a human monocytic cell line after complexed IgG stimulation. The THP1-Lucia NF- $\kappa$ B monocytic cell line (Invivogen) was stimulated with Fc OxyBURST™ (Invitrogen, F2902) at a concentration of 10  $\mu$ g/mL in the presence of 1  $\mu$ M tolebrutinib or DMSO 0.001% (n=6 technical replicates). \* $P \leq 0.001$  (one-way ANOVA with post hoc Sidak test). DMSO = dimethyl sulfoxide; IgG = immunoglobulin G; NF- $\kappa$ B = nuclear factor-kappa B; RLU = relative light unit. Source data are provided as a Source Data file.

**IL-12(L)-23p40**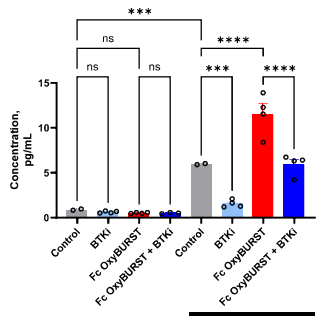**IL-10**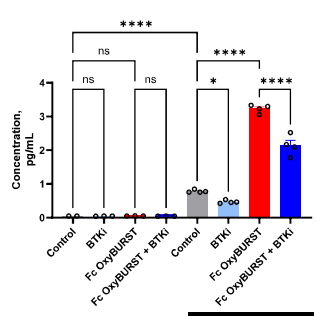**IFN-γ**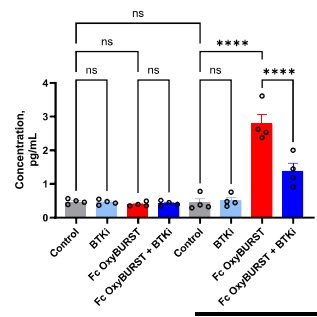**IL-6**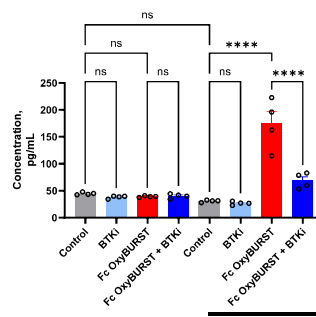**IL-13**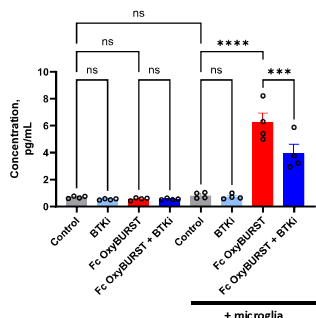**IL-1α**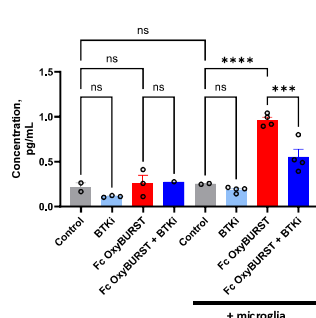**IL-15**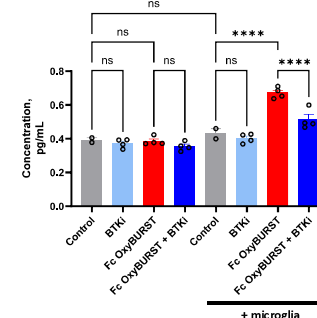**IP-10**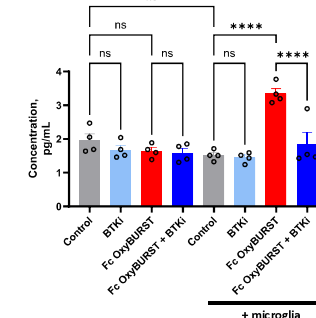**MIP-1α**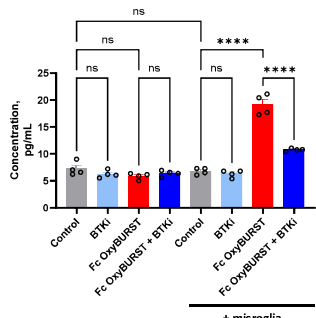**MIP-1β**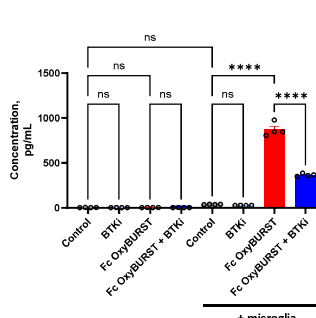**IL-8**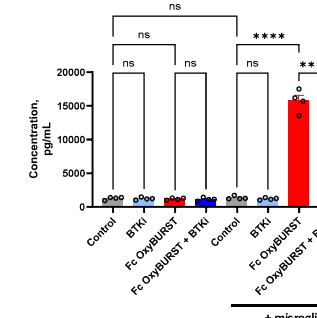**MDC**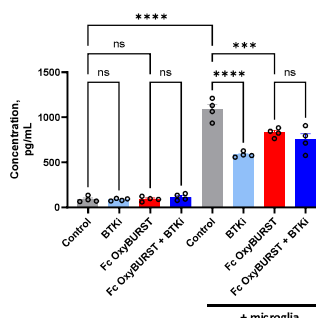**IL-16**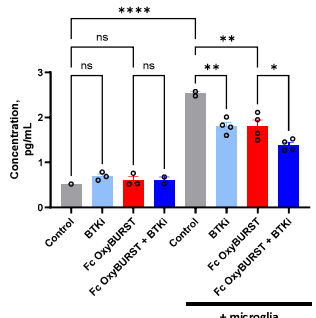**IL-7**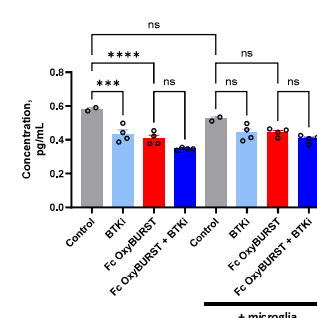**TARC**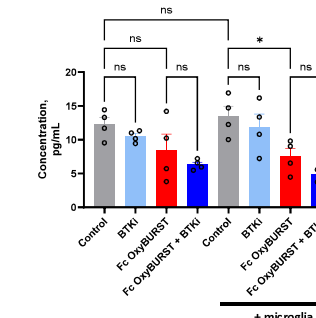**VEGF-A**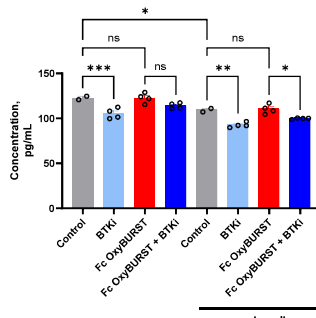**Eotaxin**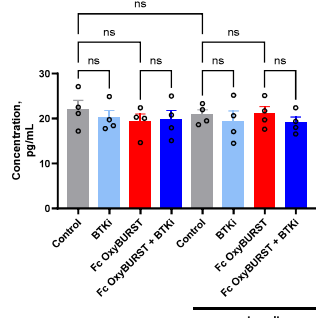**Eotaxin-3**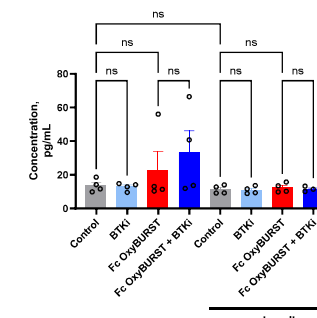**MCP-4**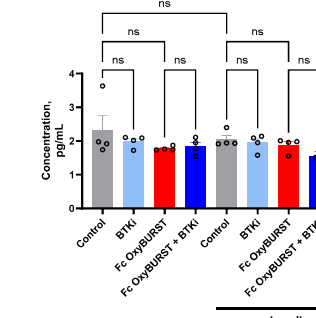

**Fig. S12. Effect of tolebrutinib 100 nM on cytokine and chemokine secretion in a human iPSC-derived culture of astrocytes and neurons, with and without microglia.** Assessments were made using multiplex panels, 24 hours after IgG, Fc OxyBURST™, stimulation and tolebrutinib addition. P-values are indicated by \* $\leq 0.05$ , \*\* $\leq 0.01$ , \*\*\* $\leq 0.001$ , and \*\*\*\* $\leq 0.0001$ . IL = interleukin; IFN = interferon; IP = interferon gamma-induced protein; MIP = macrophage inflammatory protein; MDC = macrophage-derived chemokine; TARC = thymus and activated-regulated chemokine; VEGF = vascular endothelial growth factor; MCP = monocyte chemoattractant protein. Source data are provided as a Source Data file.



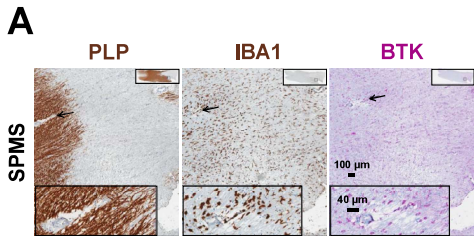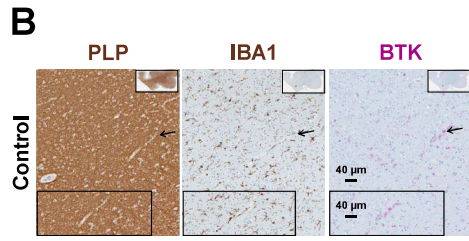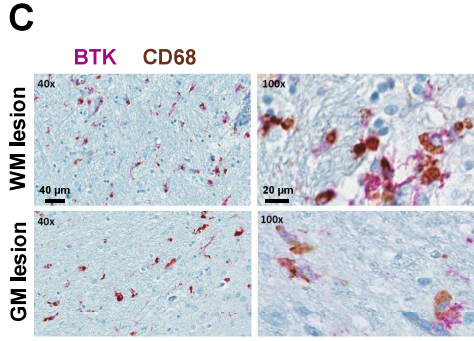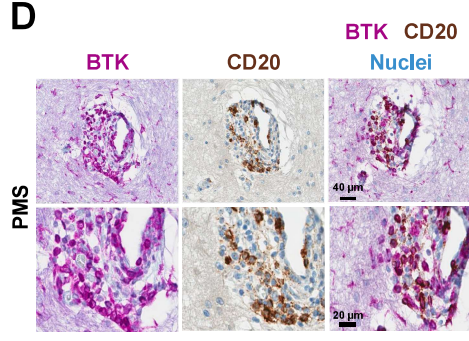

**Fig. S13.** (A–B) Immunohistochemistry analysis for myelin PLP, IBA1 and BTK around a lesion rim in an SPMS (Panel A) and a control (Panel B) specimen. (C) Immunohistochemistry analysis for BTK and CD68 in a white and grey matter lesion in a PMS specimen. (D) Immunohistochemistry analysis for BTK and CD20 around a blood vessel in a PMS specimen. BTK<sup>+</sup>/CD20<sup>+</sup> B cells were present almost exclusively in the perivascular space in progressive MS patient tissue. Positive: BTK (Cell Signaling Technology; Cat# 8547; protein concentration, 5.88 µg/mL; final concentration, 0.29 µg/mL [1:20]); CD20 (Biocare Medical; Cat# CM 004; protein concentration 23.75 µg/mL; final concentration 0.24 µg/mL [1:100]). Negative: rabbit monoclonal IgG (Abcam; Cat# ab172730; protein concentration, 1.89 mg/mL; final concentration, 0.29 µg/mL [1:6500]); mouse IgG2a (BD Pharmingen; Cat# 550339; protein concentration, 250 µg/mL; final concentration, 0.24 µg/mL [1:1050]). Antibodies diluted in 10% Goat serum (Vector Labs) in 0.01% Triton X in phosphate-buffered saline. Tissues: Positive: formalin-fixed, paraffin-embedded (FFPE) human lymph node (Ventana). Reagents for staining: ChromoMap 3,3'-diaminobenzidine (DAB; Roche; Cat# 05266645001); Omni anti-rabbit HRP (Roche; Cat # 05269679001); Omni anti-mouse HRP (Roche; Cat# 05269652001); Discovery Purple (Roche; Cat# 07053983001); Hematoxylin (Roche; Cat# 05266726001); Bluing Solution (Roche; Cat# 05266769001); Discovery Inhibitor (Roche; Cat# 07017944001). BTK = Bruton's tyrosine kinase; CD = cluster of differentiation; GM = grey matter; HRP = horseradish peroxidase; IBA1 = ionized calcium binding adaptor molecule 1; MS = multiple sclerosis; PLP = proteolipid protein; PMS = progressive MS; SPMS = secondary progressive MS; WM = white matter.

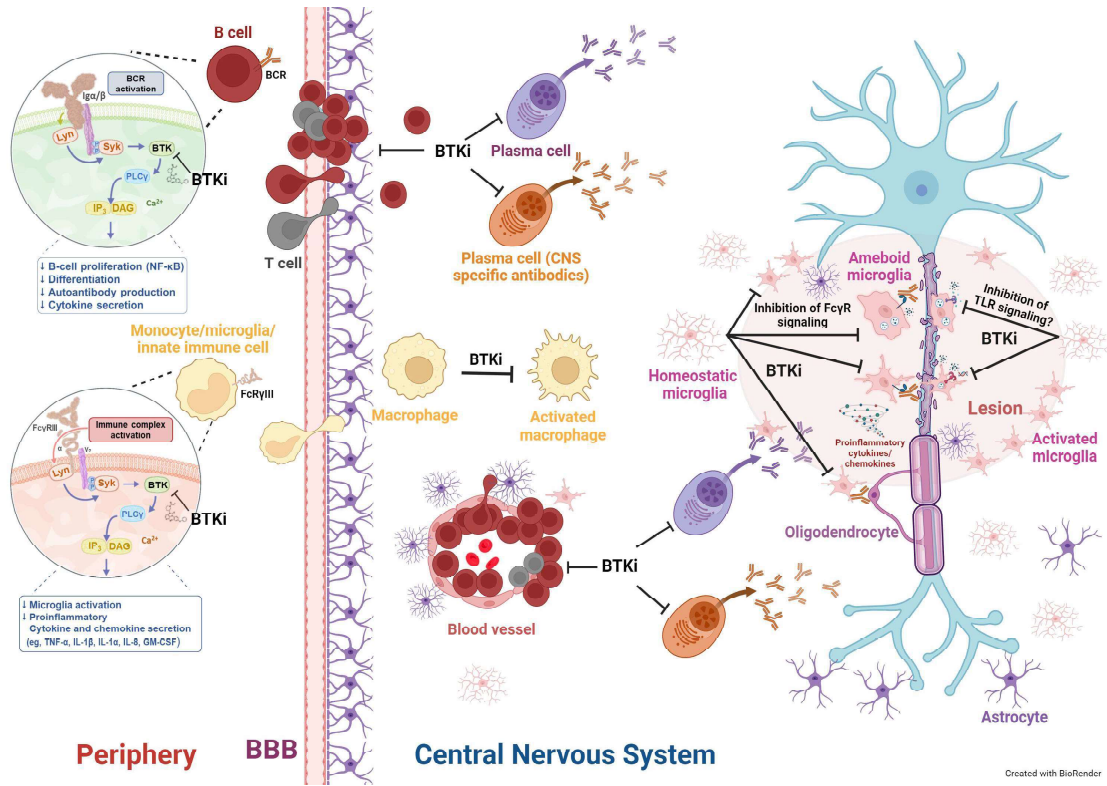

**Fig. S14. Proposed mechanisms of BTKi in MS.** A brain penetrant BTKi, has the potential to target adaptive and innate immunopathological mechanisms of MS on both sides of the BBB. BTK is located downstream of the BCR in B cells, and immunoglobulin receptors (e.g., Fc $\gamma$ R) and molecular pattern sensors (e.g., TLRs) in innate immune cells, including monocytes, macrophages, and CNS-resident microglia. In MS, BTKi-induced blockade of BCR signaling in the periphery and the CNS may suppress B-cell proliferation, differentiation of B cells into plasma cells, and autoantibody and cytokine production, resulting in decreased CNS lymphocytic infiltration and neuroinflammation (reviewed in Krämer, J., et al<sup>13</sup>). BTKi-induced blockade of pathogenic innate immune cell signaling is proposed to decrease cytokine production and the activation of macrophages and microglia in the CNS, potentially suppressing immune-mediated demyelination and axonal damage. BBB = blood-brain barrier; BCR = B-cell receptor; BTK = Bruton's tyrosine kinase; BTKi = BTK inhibitor; CNS = central nervous system; DAG = diacylglycerol; Fc $\gamma$ R = Fc-gamma receptor; IL = interleukin; IP3= inositol 1,4,5-trisphosphate; NF- $\kappa$ B = nuclear factor-kappa B; PLC $\gamma$  = phospholipase C gamma; Syk = spleen tyrosine kinase; TLR = Toll-like receptor; TNF- $\alpha$  = tumor necrosis factor-alpha. Created in BioRender. Gruber, R. (2023) <https://BioRender.com/j66p849>.

**A**

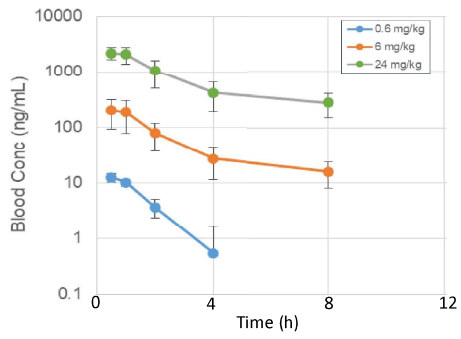

| Treatment Groups  | Animals per group |
|-------------------|-------------------|
| Vehicle           | 4                 |
| PRN2675 0.6 mg/kg | 4                 |
| PRN2675 6.0 mg/kg | 4                 |
| PRN2675 24 mg/kg  | 4                 |

\*Mice were perfused

| Dose         | Brain (ng/g) | Blood (ng/ml) | Brain / Blood |
|--------------|--------------|---------------|---------------|
| 0.6 mg/kg QD | 2.71         | 10            | 0.271         |
| 6 mg/kg QD   | 113          | 423           | 0.267         |
| 24 mg/kg QD  | 851          | 1910          | 0.446         |

1hr post dose

**B**

|       | Target IC50 (nM) |         |
|-------|------------------|---------|
|       | Tolebrutinib     | PRN2675 |
| BTK   | 0.7              | 1.2     |
| BLK   | 0.6              | 4       |
| BMX   | 1.1              | 3.8     |
| EGFR  | 4.1              | 31      |
| ERBB2 | 60               | 6.2     |
| ERBB4 | 1                | 4200    |
| ITK   | 365              | >5000   |
| JAK3  | 1851             | >5000   |
| TEC   | 1                | 1.6     |
| TXK   | 1.7              | 15.6    |

**Fig. S15. PRN2675 brain penetrance and pharmacokinetics in mouse and kinase selectivity. (A)**

Time course of PRN2675 blood concentration following PO dosing and brain exposure 1 hour post dose.

(B) Kinase selectivity for BTK inhibitors tolebrutinib and PRN2675.  $IC_{50}$  = half maximal inhibitory

concentration. Source data are provided as a Source Data file.

**SUPPLEMENTARY TABLES****Table S1.** Samples for *in vitro* investigation of the mouse transcriptomic signature

| <b>Samples ID</b>           | <b>Time point</b> | <b>New ID</b> |
|-----------------------------|-------------------|---------------|
| 10042018 No Tx-1            | 24 hours          | 13            |
| 10042018 No Tx-2            | 24 hours          | 14            |
| 10042018 No Tx-3            | 24 hours          | 15            |
| 10042018 No Tx-4            | 24 hours          | 16            |
| 10042018 Agg IgG-1          | 24 hours          | 17            |
| 10042018 Agg IgG-2          | 24 hours          | 18            |
| 10042018 Agg IgG-3          | 24 hours          | 19            |
| 10042018 Agg IgG-4          | 24 hours          | 20            |
| 10042018 Agg IgG +<br>PRN-1 | 24 hours          | 21            |
| 10042018 Agg IgG +<br>PRN-2 | 24 hours          | 22            |
| 10042018 Agg IgG +<br>PRN-3 | 24 hours          | 23            |
| 10042018 Agg IgG +<br>PRN-4 | 24 hours          | 24            |

**Table S2.** Human autopsy samples

| <b>Patient samples</b> |                  |                      |                                                   |            |               |                               |            |
|------------------------|------------------|----------------------|---------------------------------------------------|------------|---------------|-------------------------------|------------|
| <b>Sample #</b>        | <b>Sample ID</b> | <b>Sample source</b> | <b>Sample type</b>                                | <b>PMI</b> | <b>RNAseq</b> | <b>Protein quantification</b> | <b>IHC</b> |
| 1                      | 5293             | UCLA<br>BB           | CTL/Liver failure, pneumonia                      | 11.5       | X             | X                             |            |
| 2                      | 4823             | UCLA<br>BB           | CTL/Lennox Gastaut syndrome, pneumonia aspiration | 11.8       | X             | X                             |            |
| 3                      | 5214             | UCLA<br>BB           | CTL, Normal                                       | 19.5       | X             | X                             |            |
| 4                      | 4621             | UCLA<br>BB           | CTL, Breast, uterine and colon cancer             | 17.6       | X             | X                             |            |
| 5                      | 4514             | UCLA<br>BB           | CTL, Lung cancer, COPD                            | 17.3       | X             | X                             |            |



|    |      |            |      |      |   |   |  |
|----|------|------------|------|------|---|---|--|
| 6  | 5154 | UCLA<br>BB | RRMS | 12.6 | X | X |  |
| 7  | 5139 | UCLA<br>BB | RRMS | 36.8 | X | X |  |
| 8  | 5095 | UCLA<br>BB | RRMS | 8.1  | X | X |  |
| 9  | 5102 | UCLA<br>BB | RRMS | 14.7 | X | X |  |
| 10 | 5123 | UCLA<br>BB | RRMS | 24.8 | X | X |  |
| 11 | 5053 | UCLA<br>BB | SPMS | 24.9 | X | X |  |
| 12 | 5056 | UCLA<br>BB | SPMS | 20.1 | X | X |  |
| 13 | 5276 | UCLA<br>BB | SPMS | 16.9 | X | X |  |
| 14 | 4959 | UCLA<br>BB | SPMS | 21.1 | X | X |  |

|    |                |            |      |      |   |   |   |
|----|----------------|------------|------|------|---|---|---|
| 15 | 4678           | UCLA<br>BB | SPMS | 13.6 | X | X |   |
| 16 | 5252           | UCLA<br>BB | SPMS | 10.5 | X | X |   |
| 17 | 4961           | UCLA<br>BB | PPMS | 9.3  | X | X |   |
| 18 | 4951           | UCLA<br>BB | PPMS | 24.8 | X | X |   |
| 19 | 2485           | UCLA<br>BB | PPMS | 9    | X | X |   |
| 20 | 5149           | UCLA<br>BB | PPMS | 11   | X | X |   |
| 21 | 3816           | UCLA<br>BB | PPMS | 20.7 | X | X |   |
| 22 | MS-<br>20-9    | CC RAP     | PPMS |      |   |   | X |
| 23 | MS-<br>32-11-2 | CC RAP     | PPMS |      |   |   | X |

|    |                |        |                                                                                |  |  |  |   |
|----|----------------|--------|--------------------------------------------------------------------------------|--|--|--|---|
| 24 | MS-<br>45-13-1 | CC RAP | PPMS                                                                           |  |  |  | X |
| 25 | MS-<br>22-10-1 | CC RAP | PPMS                                                                           |  |  |  | X |
| 26 | MS-<br>138-8-3 | CC RAP | SPMS                                                                           |  |  |  | X |
| 27 | MS-<br>117-9-2 | CC RAP | SPMS                                                                           |  |  |  | X |
| 28 | MS-<br>151-5-1 | CC RAP | SPMS                                                                           |  |  |  | X |
| 29 | MS-<br>85-4-1  | CC RAP | RRMS                                                                           |  |  |  | X |
| 30 | MS-<br>19-7-1  | CC RAP | RRMS                                                                           |  |  |  | X |
| 31 | A168-<br>3-5   | CC RAP | CTL,<br>diabetes,<br>chronic<br>kidney<br>disease,<br>myocardial<br>infarction |  |  |  | X |

|                                                                                                                                                                                                                                                                                                                         |              |        |     |  |  |  |   |
|-------------------------------------------------------------------------------------------------------------------------------------------------------------------------------------------------------------------------------------------------------------------------------------------------------------------------|--------------|--------|-----|--|--|--|---|
| 32                                                                                                                                                                                                                                                                                                                      | A119-<br>3-2 | CC RAP | CTL |  |  |  | X |
| <p>UCLA Brain Bank (UCLA BB), Cleveland Clinic Rapid Autopsy Program (CC RAP)</p> <p>Percentage female among sample types: Control (66.7), RRMS (42.9), SPMS (57.1), PPMS (44.4)</p> <p>Age of sample donors (mean, standard deviation): Control (59.0, 17.9), RRMS (64.3, 11.6), SPMS (52, 10.1), PPMS (55.2, 8.5)</p> |              |        |     |  |  |  |   |
